# Supplementary material
Source: publisher figshare collection journal article supplement (https://sage.figshare.com/ndownloader/files/16668806)

**Figure 1 – Percentage of internet users (right graph) and percentage of online governmental services users (left graph) by age**

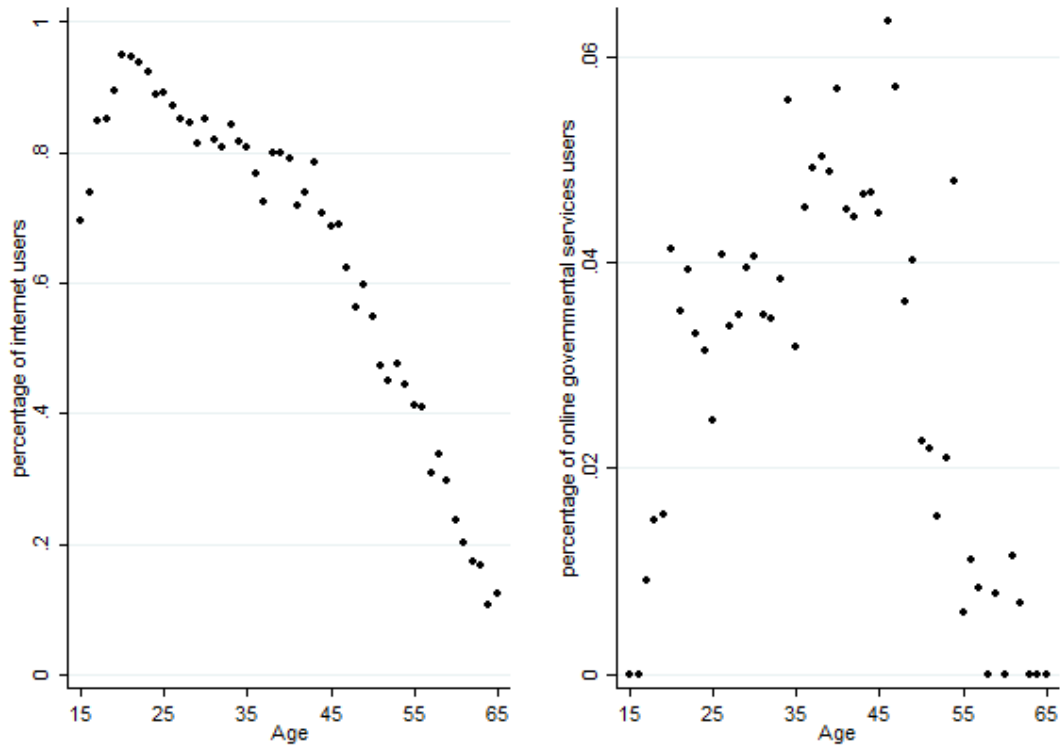

Supplement: Supplementary file 1 [file 16668806]
